# Supplementary material for: Plaque morphology in acute symptomatic intracranial atherosclerotic disease
Source: PubMed Central journal article supplement — J Neurol Neurosurg Psychiatry. 2020 Nov 25;92(4):370–6. doi: 10.1136/jnnp-2020-325027 (PMC7958085; doi:10.1136/jnnp-2020-325027), 2020-11-25
Supplement: jnnp-2020-325027supp001.pdf [file jnnp-2020-325027supp001.pdf]

**Leung TW *et al.*, Plaque Morphology in Acute Symptomatic Intracranial Atherosclerotic Disease****SUPPLEMENTAL MATERIALS****Table of Contents**

|                                                                                                                                                                                                                |          |
|----------------------------------------------------------------------------------------------------------------------------------------------------------------------------------------------------------------|----------|
| <b>Supplemental Table 1. Demographics and vascular risk factors of patients with smooth, irregular or ulcerative plaques.....</b>                                                                              | <b>2</b> |
| <b>Supplemental Table 2. Characteristics of patients with different infarct loads in the territory of the diseased intracranial artery in the anterior circulation .....</b>                                   | <b>3</b> |
| <b>Supplemental Table 3. Univariable logistic regression analyses for factors associated with presence of coexisting acute and chronic infarcts in the territory of the diseased intracranial artery .....</b> | <b>5</b> |

**Supplemental Table 1. Demographics and vascular risk factors of patients with smooth, irregular or ulcerative plaques \***

| Characteristics                   | Overall<br>(N=180) | Plaque types  |                      |                      | P values † | P values ‡ |
|-----------------------------------|--------------------|---------------|----------------------|----------------------|------------|------------|
|                                   |                    | Smooth (n=51) | Irregular<br>(n=101) | Ulcerative<br>(n=28) |            |            |
| Age, y                            | 60 (54-68)         | 61 (54-69)    | 61 (54-69)           | 59 (56-66)           | 0.993      | 0.951      |
| Male                              | 114 (63.3)         | 30 (58.8)     | 66 (65.3)            | 18 (64.3)            | 0.728      | 0.909      |
| Current smoker                    | 84 (46.7)          | 25 (49.0)     | 48 (47.5)            | 11 (39.3)            | 0.685      | 0.394      |
| History of dyslipidemia           | 143 (79.4)         | 44 (86.3)     | 77 (76.2)            | 22 (78.6)            | 0.349      | 0.901      |
| History of hypertension           | 123 (68.3)         | 32 (62.7)     | 72 (71.3)            | 19 (67.9)            | 0.564      | 0.953      |
| History of diabetes               | 64 (35.6)          | 18 (35.3)     | 35 (34.7)            | 11 (39.3)            | 0.901      | 0.654      |
| Systolic blood pressure, mmHg     | 150 (135-167)      | 152 (135-167) | 150 (136-167)        | 149 (134-165)        | 0.807      | 0.680      |
| Diastolic blood pressure, mmHg    | 81 (70-90)         | 83 (73-90)    | 81 (73-90)           | 80 (65-90)           | 0.517      | 0.266      |
| Laboratory test results           |                    |               |                      |                      |            |            |
| Glycosylated hemoglobin, % §      | 6.2 (5.6-7.2)      | 6.4 (5.8-7.2) | 6.3 (5.6-7.5)        | 6.6 (6.0-7.8)        | 0.616      | 0.386      |
| Fasting blood glucose, mmol/L §   | 5.8 (5.1-7.1)      | 5.9 (5.3-7.0) | 5.5 (5.0-7.2)        | 6.7 (5.6-7.6)        | 0.037      | 0.047      |
| Low-density lipoprotein, mmol/L § | 3.3 (2.7-4.1)      | 3.7 (2.9-4.5) | 3.3 (2.6-3.9)        | 3.4 (2.7-4.3)        | 0.052      | 0.582      |
| High-density lipoprotein, mmol/L  | 1.1 (0.9-1.4)      | 1.2 (1.0-1.5) | 1.1 (0.9-1.4)        | 1.1 (0.9-1.4)        | 0.181      | 0.923      |
| Triglycerides, mmol/L             | 1.5 (1.1-1.9)      | 1.5 (1.2-1.9) | 1.4 (1.0-2.1)        | 1.5 (1.2-1.9)        | 0.898      | 0.785      |

\* Values are medians (interquartile range) or numbers (%); Kruskal-Wallis tests or Wilcoxon rank sum tests were used for comparison of continuous variables and chi-square tests for categorical variables.

† P values for comparisons among the three groups.

‡ P values for comparisons between patients with an ulcerative plaque and other patients.

§ Data were missing in 35, 2 and 1 cases for the testing results of glycosylated hemoglobin, fasting blood glucose, and low-density lipoprotein, respectively.

**Supplemental Table 2. Characteristics of patients with different infarct loads in the territory of the diseased intracranial artery in the anterior circulation \***

| Characteristics (n=164)          | Infarct loads in the relevant territory |                                                      |                                              | P values † | P values ‡ |
|----------------------------------|-----------------------------------------|------------------------------------------------------|----------------------------------------------|------------|------------|
|                                  | None (n=23)                             | Acute infarcts only or chronic infarcts only (n=113) | Coexisting acute and chronic infarcts (n=28) |            |            |
| Age, y                           | 53 (50-59)                              | 61 (55-70)                                           | 62 (56-69)                                   | 0.002      | 0.356      |
| Male                             | 17 (73.9)                               | 68 (60.2)                                            | 19 (67.9)                                    | 0.398      | 0.592      |
| Current smoker                   | 13 (56.5)                               | 47 (41.6)                                            | 17 (60.7)                                    | 0.118      | 0.109      |
| History of dyslipidemia          | 16 (69.6)                               | 89 (78.8)                                            | 24 (85.7)                                    | 0.375      | 0.317      |
| History of hypertension          | 11 (47.8)                               | 72 (63.7)                                            | 25 (89.3)                                    | 0.006      | 0.004      |
| History of diabetes              | 3 (13.0)                                | 43 (38.1)                                            | 13 (46.4)                                    | 0.034      | 0.206      |
| Systolic blood pressure, mmHg    | 152 (133-166)                           | 150 (136-165)                                        | 156 (136-169)                                | 0.636      | 0.346      |
| Diastolic blood pressure, mmHg   | 85 (75-90)                              | 80 (70-89)                                           | 82 (70-92)                                   | 0.415      | 0.586      |
| Laboratory test results          |                                         |                                                      |                                              |            |            |
| Glycosylated hemoglobin, %       | 5.8 (5.3-6.5)                           | 6.4 (5.8-8.4)                                        | 6.4 (6.0-7.3)                                | 0.011      | 0.876      |
| Fasting blood glucose, mmol/L    | 5.1 (4.9-5.9)                           | 5.9 (5.2-7.6)                                        | 6.2 (5.2-7.2)                                | 0.014      | 0.482      |
| Low-density lipoprotein, mmol/L  | 3.3 (2.6-4.6)                           | 3.4 (2.7-4.1)                                        | 3.3 (2.7-3.9)                                | 0.816      | 0.668      |
| High-density lipoprotein, mmol/L | 1.3 (1.0-1.5)                           | 1.1 (0.9-1.3)                                        | 1.2 (0.9-1.5)                                | 0.040      | 0.335      |

|                                         |               |               |               |       |       |
|-----------------------------------------|---------------|---------------|---------------|-------|-------|
| Triglycerides, mmol/L                   | 1.3 (1.0-1.6) | 1.5 (1.2-2.0) | 1.5 (1.2-2.1) | 0.193 | 1.000 |
| Location of the qualifying ICAD lesions |               |               |               | 0.193 | 0.514 |
| MCA-M1                                  | 20 (87.0)     | 91 (80.5)     | 21 (75.0)     |       |       |
| Terminal ICA                            | 1 (4.3)       | 20 (17.7)     | 5 (17.9)      |       |       |
| Across terminal ICA and proximal MCA    | 2 (8.7)       | 2 (1.8)       | 2 (7.1)       |       |       |
| Plaque types                            |               |               |               | 0.012 | 0.004 |
| Smooth                                  | 8 (34.8)      | 36 (31.9)     | 5 (17.9)      |       |       |
| Irregular                               | 13 (56.5)     | 64 (56.6)     | 12 (46.4)     |       |       |
| Ulcerative                              | 2 (8.7)       | 13 (11.5)     | 10 (35.7)     |       |       |
| Arterial luminal stenosis, %            | 75 (71-82)    | 75 (71-86)    | 76 (70-82)    | 0.978 | 0.837 |

\* Values are medians (interquartile range) or numbers (%); Kruskal-Wallis tests or Wilcoxon rank sum tests were used for comparison of continuous variables and chi-square tests for categorical variables.

† P values for comparisons among the three groups.

‡ P values for comparisons between patients with coexisting acute and chronic infarcts in the relevant territory and other patients.

Abbreviations: ICAD, intracranial atherosclerotic disease; MCA-M1, M1 middle cerebral artery; ICA, internal carotid artery.

**Supplemental Table 3. Univariable logistic regression analyses for factors associated with presence of coexisting acute and chronic infarcts in the territory of the diseased intracranial artery**

| Characteristics                  | All patients (N=180) |          | Patients with anterior-circulation ICAD (n=164) |          |
|----------------------------------|----------------------|----------|-------------------------------------------------|----------|
|                                  | OR (95% CI)          | P values | OR (95% CI)                                     | P values |
| Age, y                           | 1.03 (0.99-1.07)     | 0.214    | 1.02 (0.98-1.07)                                | 0.287    |
| Male                             | 0.89 (0.39-2.06)     | 0.790    | 1.27 (0.53-3.01)                                | 0.593    |
| Current smoker                   | 1.78 (0.79-3.98)     | 0.162    | 1.96 (0.85-4.49)                                | 0.113    |
| History of dyslipidemia          | 1.75 (0.57-5.38)     | 0.330    | 1.77 (0.57-5.49)                                | 0.322    |
| History of hypertension          | 4.83 (1.40-16.68)    | 0.013    | 5.32 (1.53-18.50)                               | 0.009    |
| History of diabetes              | 1.89 (0.84-4.21)     | 0.122    | 1.70 (0.74-3.86)                                | 0.209    |
| Systolic blood pressure, mmHg    | 1.01 (1.00-1.02)     | 0.250    | 1.01 (0.99-1.03)                                | 0.331    |
| Diastolic blood pressure, mmHg   | 1.01 (0.98-1.03)     | 0.614    | 1.01 (0.98-1.04)                                | 0.643    |
| Laboratory test results          |                      |          |                                                 |          |
| Glycosylated hemoglobin, %       | 0.98 (0.79-1.21)     | 0.844    | 0.94 (0.75-1.17)                                | 0.561    |
| Fasting blood glucose, mmol/L    | 1.06 (0.90-1.25)     | 0.508    | 1.01 (0.85-1.21)                                | 0.875    |
| Low-density lipoprotein, mmol/L  | 0.86 (0.59-1.27)     | 0.457    | 0.88 (0.59-1.31)                                | 0.536    |
| High-density lipoprotein, mmol/L | 1.94 (0.67-5.62)     | 0.222    | 1.75 (0.59-5.19)                                | 0.313    |
| Triglycerides, mmol/L            | 1.07 (0.76-1.51)     | 0.701    | 1.05 (0.74-1.50)                                | 0.790    |
| Plaque types                     |                      |          |                                                 |          |
| Smooth/irregular                 | 1.00                 |          | 1.00                                            |          |
| Ulcerative                       | 3.89 (1.57-9.66)     | 0.003    | 4.48 (1.75-11.48)                               | 0.002    |

Abbreviations: ICAD, intracranial atherosclerotic disease; OR, odds ratio; CI, confidence interval.
